# Supplementary material for: Spatial and temporal changes in autumn Eurasian snow cover and its relationship with the Arctic Oscillation
Source: Copernicus journal article supplement (doi:10.5194/egusphere-2024-1892), 2024-07-05
Supplement: Supplementary file 1 [file egusphere-2024-1892-supplement.pdf]

## Supplementary Material

**Table S1.** Details of the 133 meteorological stations from which daily snow depth data were used to define snow onset. Data availability is the proportion of years for which snow onset can be calculated.

| WMO Number | Station Name       | Latitude (°N) | Longitude (°E) | Elevation (m a.s.l.) | Data availability: 2003-2022 (%) | Data availability: 1966-2022 (%) |
|------------|--------------------|---------------|----------------|----------------------|----------------------------------|----------------------------------|
| 20674      | Ostrov Dikson      | 73.50         | 80.40          | 42                   | 100.0                            | 100.0                            |
| 20891      | Hatanga            | 71.98         | 102.47         | 31                   | 100.0                            | 100.0                            |
| 21946      | Chokurdah          | 70.62         | 147.88         | 44                   | 100.0                            | 100.0                            |
| 22113      | Murmansk           | 68.97         | 33.05          | 57                   | 100.0                            | 100.0                            |
| 22217      | Kandalaksa         | 67.15         | 32.35          | 26                   | 100.0                            | 100.0                            |
| 22550      | Arkhangelsk        | 64.50         | 40.73          | 8                    | 100.0                            | 98.2                             |
| 22583      | Kojnas             | 64.75         | 47.65          | 63                   | 100.0                            | 100.0                            |
| 22602      | Reboly             | 63.83         | 30.82          | 180                  | 100.0                            | 100.0                            |
| 22641      | Onega              | 63.90         | 38.12          | 11                   | 100.0                            | 100.0                            |
| 22802      | Sortavala          | 61.72         | 30.72          | 17                   | 100.0                            | 98.2                             |
| 22820      | Petrozavodsk       | 61.82         | 34.27          | 112                  | 100.0                            | 100.0                            |
| 22837      | Vytegra            | 61.02         | 36.45          | 55                   | 100.0                            | 100.0                            |
| 22887      | Kotlas             | 61.27         | 46.72          | 55                   | 100.0                            | 100.0                            |
| 23205      | Nar'Jan-Mar        | 67.63         | 53.03          | 10                   | 100.0                            | 100.0                            |
| 23405      | Ust'-Cil'Ma        | 65.43         | 52.27          | 78                   | 100.0                            | 100.0                            |
| 23418      | Pechora            | 65.12         | 57.10          | 53                   | 100.0                            | 100.0                            |
| 23472      | Turuhansk          | 65.78         | 87.93          | 38                   | 100.0                            | 100.0                            |
| 23527      | Saran-Paul         | 64.28         | 60.88          | 28                   | 100.0                            | 96.5                             |
| 23552      | Tarko-Sale         | 64.92         | 77.82          | 26                   | 100.0                            | 98.2                             |
| 23631      | Berezovo           | 63.93         | 65.05          | 27                   | 100.0                            | 100.0                            |
| 23678      | Verhneimbatsk      | 63.15         | 87.95          | 46                   | 100.0                            | 100.0                            |
| 23711      | Troicko-Pechorskoe | 62.70         | 56.20          | 134                  | 95.0                             | 98.2                             |
| 23724      | Njaksimvol'        | 62.43         | 60.87          | 50                   | 100.0                            | 100.0                            |
| 23734      | Oktjabr'Skoe       | 62.75         | 66.05          | 70                   | 100.0                            | 98.2                             |
| 23804      | Syktyvkar          | 61.68         | 50.78          | 116                  | 100.0                            | 100.0                            |
| 23884      | Bor                | 61.60         | 90.02          | 62                   | 100.0                            | 100.0                            |
| 23891      | Bajkit             | 61.67         | 96.37          | 256                  | 100.0                            | 100.0                            |
| 23921      | Ivdel              | 60.68         | 60.45          | 93                   | 100.0                            | 100.0                            |
| 23933      | Hanty-Mansijsk     | 61.02         | 69.03          | 44                   | 100.0                            | 100.0                            |
| 23955      | Aleksandrovscoe    | 60.43         | 77.87          | 47                   | 100.0                            | 100.0                            |
| 23966      | Vanzil'-Kynak      | 60.35         | 84.08          | 98                   | 100.0                            | 100.0                            |
| 24125      | Olenek             | 68.50         | 112.43         | 217                  | 95.0                             | 98.2                             |
| 24266      | Verhojansk         | 67.57         | 133.40         | 136                  | 100.0                            | 100.0                            |
| 24343      | Zhigansk           | 66.77         | 123.40         | 88                   | 100.0                            | 98.2                             |
| 24507      | Tura               | 64.27         | 100.23         | 205                  | 100.0                            | 100.0                            |
| 24639      | Njurba             | 63.28         | 118.33         | 117                  | 100.0                            | 98.2                             |
| 24641      | Viljujsk           | 63.78         | 121.62         | 111                  | 100.0                            | 100.0                            |
| 24671      | Tompo              | 63.95         | 135.87         | 399                  | 100.0                            | 93.0                             |
| 24688      | Ojmjakon           | 63.25         | 143.15         | 740                  | 100.0                            | 100.0                            |
| 24738      | Suntar             | 62.15         | 117.65         | 131                  | 100.0                            | 100.0                            |
| 24768      | Churapca           | 62.03         | 132.60         | 181                  | 100.0                            | 98.2                             |
| 24817      | Erbogacen          | 61.27         | 108.02         | 284                  | 100.0                            | 100.0                            |
| 24908      | Vanavara           | 60.33         | 102.27         | 259                  | 100.0                            | 100.0                            |
| 24923      | Lensk              | 60.72         | 114.88         | 241                  | 100.0                            | 98.2                             |
| 24944      | Olekminsk          | 60.40         | 120.42         | 225                  | 100.0                            | 100.0                            |
| 24951      | Isit               | 60.82         | 125.32         | 123                  | 100.0                            | 98.2                             |
| 24959      | Yakutsk            | 62.02         | 129.72         | 98                   | 100.0                            | 98.2                             |
| 24966      | Ust'-Maja          | 60.38         | 134.45         | 169                  | 100.0                            | 100.0                            |
| 24982      | Uyega              | 60.72         | 142.78         | 396                  | 100.0                            | 98.2                             |
| 25551      | Markovo            | 64.68         | 170.42         | 25                   | 100.0                            | 100.0                            |
| 25563      | Anadyr'            | 64.78         | 177.57         | 64                   | 100.0                            | 100.0                            |
| 25703      | Sejmchan           | 62.92         | 152.42         | 206                  | 100.0                            | 100.0                            |
| 25913      | Magadan            | 59.55         | 150.78         | 115                  | 100.0                            | 100.0                            |
| 26063      | St. Petersburg     | 59.97         | 30.30          | 3                    | 95.0                             | 98.2                             |
| 26477      | Velikie Luki       | 56.35         | 30.62          | 97                   | 95.0                             | 98.2                             |
| 26781      | Smolensk           | 54.75         | 32.07          | 236                  | 100.0                            | 100.0                            |

| WMO Number | Station Name              | Latitude (°N) | Longitude (°E) | Elevation (m a.s.l.) | Data availability: 2003-2022 (%) | Data availability: 1966-2022 (%) |
|------------|---------------------------|---------------|----------------|----------------------|----------------------------------|----------------------------------|
| 27037      | Vologda                   | 59.32         | 39.92          | 125                  | 100.0                            | 100.0                            |
| 27333      | Kostroma                  | 57.77         | 40.85          | 125                  | 100.0                            | 98.2                             |
| 28064      | Leusi                     | 59.62         | 65.72          | 70                   | 100.0                            | 100.0                            |
| 28138      | Biser                     | 58.52         | 58.85          | 463                  | 100.0                            | 100.0                            |
| 28144      | Verhotur'E                | 58.87         | 60.78          | 124                  | 100.0                            | 98.2                             |
| 28240      | Nizhny Tagil              | 57.88         | 60.07          | 262                  | 100.0                            | 96.5                             |
| 28255      | Turinsk                   | 58.05         | 63.68          | 101                  | 90.0                             | 94.7                             |
| 28275      | Tobol'sk                  | 58.15         | 68.25          | 45                   | 100.0                            | 100.0                            |
| 28367      | Tyumen                    | 57.12         | 65.43          | 101                  | 100.0                            | 98.2                             |
| 28411      | Izhevsk                   | 56.83         | 53.45          | 155                  | 100.0                            | 100.0                            |
| 28434      | Krasnoufimsk              | 56.65         | 57.78          | 205                  | 100.0                            | 100.0                            |
| 28440      | Ekaterinburg              | 56.83         | 60.63          | 280                  | 100.0                            | 100.0                            |
| 28493      | Tara                      | 56.90         | 74.38          | 73                   | 100.0                            | 100.0                            |
| 28661      | Kurgan                    | 55.47         | 65.40          | 73                   | 100.0                            | 98.2                             |
| 28698      | Omsk                      | 55.00         | 73.40          | 121                  | 100.0                            | 98.2                             |
| 28722      | Ufa                       | 54.72         | 55.83          | 104                  | 100.0                            | 100.0                            |
| 28900      | Samara                    | 53.25         | 50.22          | 136                  | 100.0                            | 100.0                            |
| 28952      | Kostanay                  | 53.21         | 63.61          | 170                  | 100.0                            | 100.0                            |
| 29023      | Napas                     | 59.85         | 81.95          | 77                   | 100.0                            | 98.2                             |
| 29111      | Sredny Vasyugan           | 59.20         | 78.20          | 68                   | 100.0                            | 100.0                            |
| 29231      | Kolpasevo                 | 58.30         | 82.95          | 73                   | 100.0                            | 100.0                            |
| 29263      | Jenisseisk                | 58.45         | 92.10          | 77                   | 100.0                            | 100.0                            |
| 29282      | Bogucany                  | 58.38         | 97.45          | 131                  | 100.0                            | 100.0                            |
| 29313      | Pudino                    | 57.57         | 79.43          | 96                   | 100.0                            | 100.0                            |
| 29328      | Bakchar                   | 57.00         | 82.07          | 109                  | 100.0                            | 100.0                            |
| 29430      | Tomsk                     | 56.50         | 84.92          | 141                  | 100.0                            | 100.0                            |
| 29612      | Barabinsk                 | 55.33         | 78.37          | 119                  | 100.0                            | 100.0                            |
| 29698      | Nizne-Udinsk              | 54.88         | 99.03          | 410                  | 100.0                            | 100.0                            |
| 29807      | Irtys'hs'k                | 53.35         | 75.45          | 94                   | 100.0                            | 100.0                            |
| 29838      | Barnaul                   | 53.40         | 83.50          | 183                  | 100.0                            | 100.0                            |
| 29866      | Minusinsk                 | 53.70         | 91.70          | 254                  | 100.0                            | 100.0                            |
| 30028      | Ika                       | 59.28         | 106.17         | 350                  | 100.0                            | 100.0                            |
| 30054      | Vitim                     | 59.45         | 112.58         | 186                  | 100.0                            | 100.0                            |
| 30230      | Kirensk                   | 57.77         | 108.07         | 257                  | 100.0                            | 100.0                            |
| 30372      | Chara                     | 56.90         | 118.27         | 709                  | 95.0                             | 98.2                             |
| 30393      | Cul'Man                   | 56.83         | 124.87         | 855                  | 100.0                            | 100.0                            |
| 30521      | Zhigalovo                 | 54.80         | 105.17         | 417                  | 100.0                            | 100.0                            |
| 30555      | Troickij Priisk           | 54.60         | 113.10         | 1315                 | 90.0                             | 91.2                             |
| 30636      | Barguzin                  | 53.60         | 109.60         | 488                  | 100.0                            | 98.2                             |
| 30673      | Mogocha                   | 53.75         | 119.73         | 624                  | 100.0                            | 100.0                            |
| 30692      | Skovorodino               | 54.00         | 123.97         | 397                  | 90.0                             | 93.0                             |
| 30710      | Irkutsk                   | 52.27         | 104.35         | 467                  | 100.0                            | 100.0                            |
| 30758      | Chita                     | 52.08         | 113.48         | 671                  | 100.0                            | 93.0                             |
| 30777      | Sretensk                  | 52.23         | 117.70         | 528                  | 100.0                            | 100.0                            |
| 30823      | Ulan-Ude                  | 51.83         | 107.60         | 514                  | 100.0                            | 100.0                            |
| 30925      | Kjahta                    | 50.37         | 106.45         | 791                  | 95.0                             | 98.2                             |
| 30965      | Borz'ya                   | 50.40         | 116.52         | 675                  | 95.0                             | 98.2                             |
| 31004      | Aldan                     | 58.62         | 125.03         | 678                  | 100.0                            | 98.2                             |
| 31088      | Ohotsk                    | 59.37         | 143.20         | 5                    | 100.0                            | 98.2                             |
| 31168      | Ayan                      | 56.45         | 138.15         | 6                    | 100.0                            | 100.0                            |
| 31253      | Bomnak                    | 54.72         | 128.87         | 365                  | 100.0                            | 98.2                             |
| 31329      | Ekimchan                  | 53.08         | 132.98         | 540                  | 100.0                            | 100.0                            |
| 31369      | Nikolaevsk-Na-Amure       | 53.13         | 140.70         | 67                   | 100.0                            | 96.5                             |
| 31388      | Norsk                     | 52.40         | 129.90         | 207                  | 100.0                            | 100.0                            |
| 31416      | Im Poliny Osipenko        | 52.42         | 136.50         | 69                   | 100.0                            | 100.0                            |
| 31510      | Blagovescet's'k           | 50.25         | 127.50         | 130                  | 100.0                            | 100.0                            |
| 31532      | Cekunda                   | 50.80         | 132.20         | 271                  | 100.0                            | 100.0                            |
| 32061      | Aleksandrovsk-Sahalinskij | 50.90         | 142.17         | 30                   | 100.0                            | 100.0                            |
| 32389      | Kljuchi                   | 56.32         | 160.83         | 28                   | 100.0                            | 98.2                             |
| 33345      | Kyiv                      | 50.40         | 30.57          | 167                  | 95.0                             | 94.7                             |

| WMO Number | Station Name       | Latitude (°N) | Longitude (°E) | Elevation (m a.s.l.) | Data availability: 2003-2022 (%) | Data availability: 1966-2022 (%) |
|------------|--------------------|---------------|----------------|----------------------|----------------------------------|----------------------------------|
| 34163      | Oktyabrsky Gorodok | 51.63         | 45.45          | 202                  | 100.0                            | 100.0                            |
| 34391      | Aleksandrov-Gaj    | 50.15         | 48.55          | 23                   | 100.0                            | 100.0                            |
| 35078      | Atbasar            | 51.82         | 68.37          | 304                  | 100.0                            | 100.0                            |
| 35108      | Uralsk             | 51.15         | 51.28          | 37                   | 100.0                            | 100.0                            |
| 35121      | Orenburg           | 51.68         | 55.10          | 115                  | 100.0                            | 100.0                            |
| 35188      | Astana             | 51.13         | 71.37          | 350                  | 100.0                            | 100.0                            |
| 35229      | Aktjubinsk         | 50.28         | 57.15          | 219                  | 100.0                            | 100.0                            |
| 36034      | Rubcovsk           | 51.58         | 81.22          | 216                  | 100.0                            | 100.0                            |
| 36177      | Semipalatinsk      | 50.42         | 80.30          | 196                  | 100.0                            | 100.0                            |

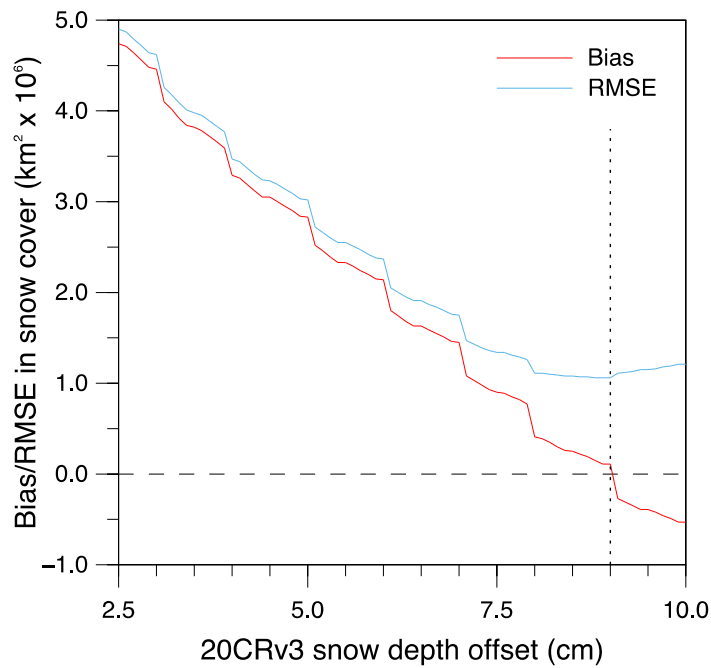

**Figure S1.** Relationship between the bias and RMSE in Eurasian SC in ERA5 (red) versus 20CRv3 (blue) for the calibration period (2003-2015). The vertical dotted line is where the bias is closest to zero and the RMSE is smallest (an offset of 9.0 cm).

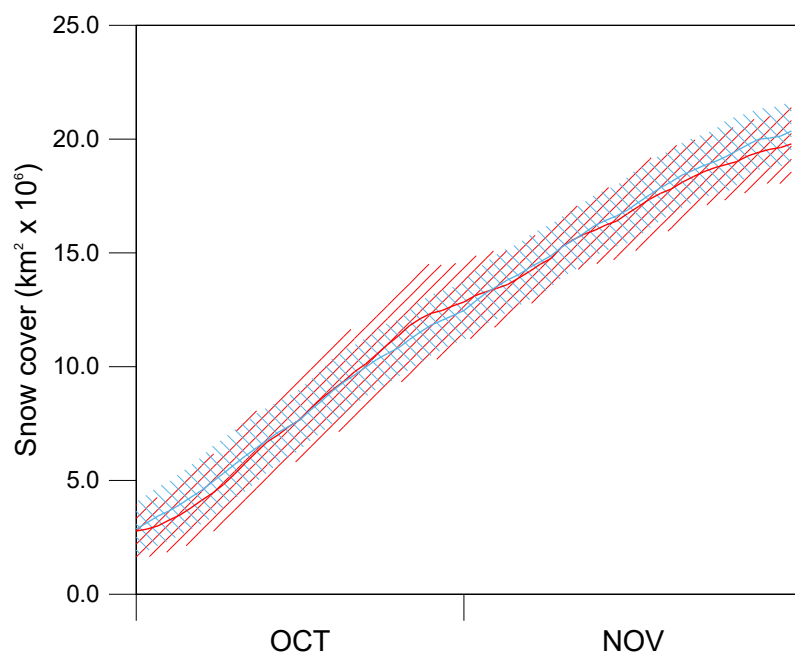

**Figure S2.** Comparison of Eurasian snow cover between ERA5 (red) and offset 20CRv3 (blue) for 2003-2015. Shading represents one standard deviation either side of the mean.
